# Supplementary material for: Eco-benign spectrofluorimetric analysis of icariin in a nano-formulation using green quantum dots: insights from in vitro anticoagulant and docking studies
Source: Royal Society of Chemistry journal article supplement (doi:10.1039/d5ra04854k), 2025-01-01
Supplement: d5ra04854k1.pdf [file d5ra04854k1.pdf]

A)

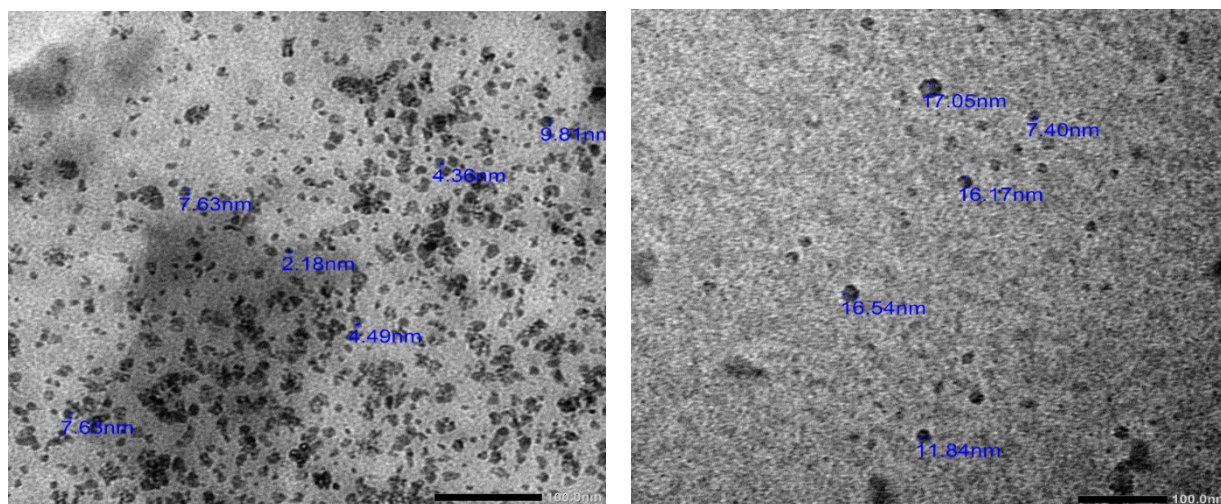

B)

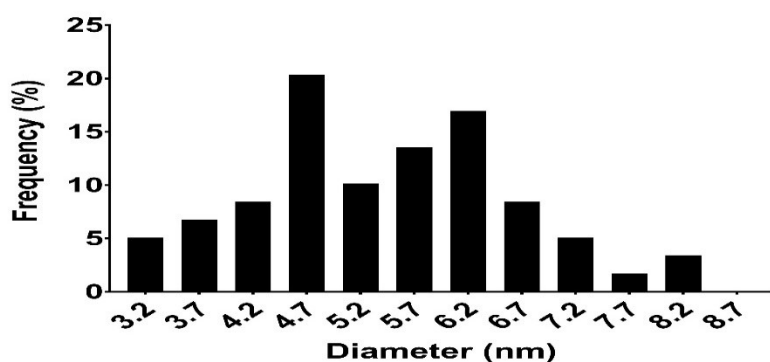

C)

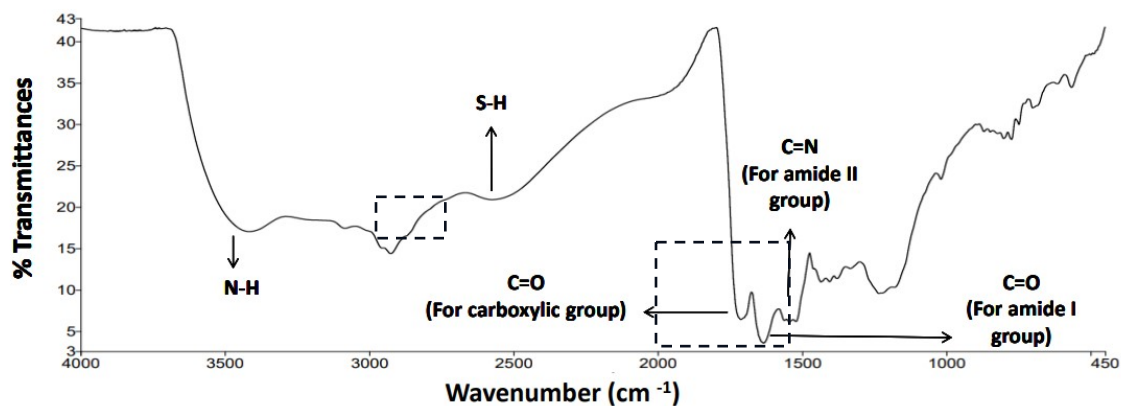

**Figure S1:** (A) TEM images of NSC-dots. (B) TEM size distribution diagram of NSC-dots.

(C) FTIR spectrum of the NSC-dots.

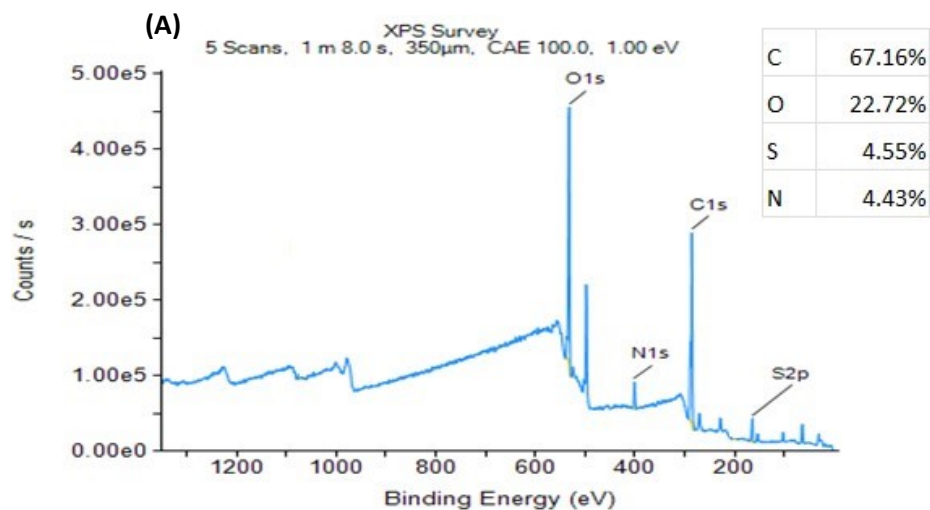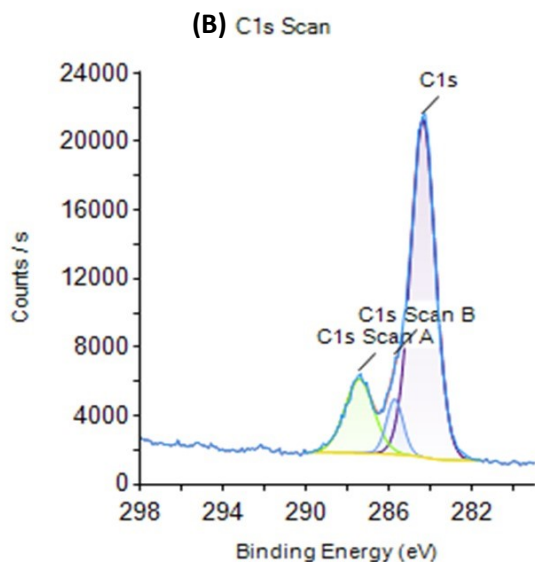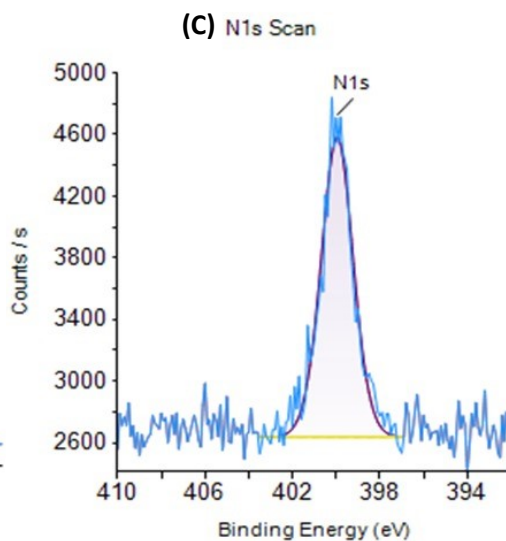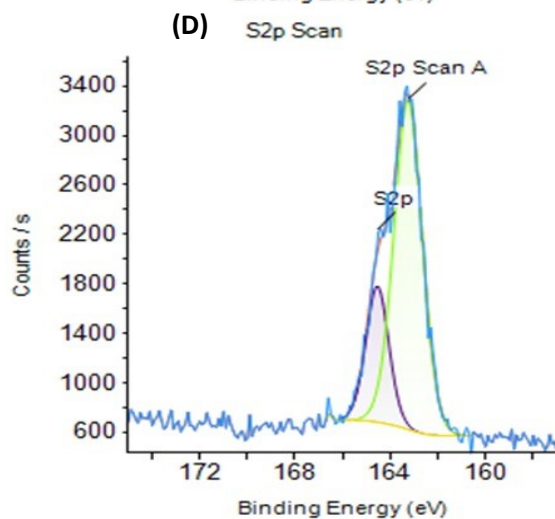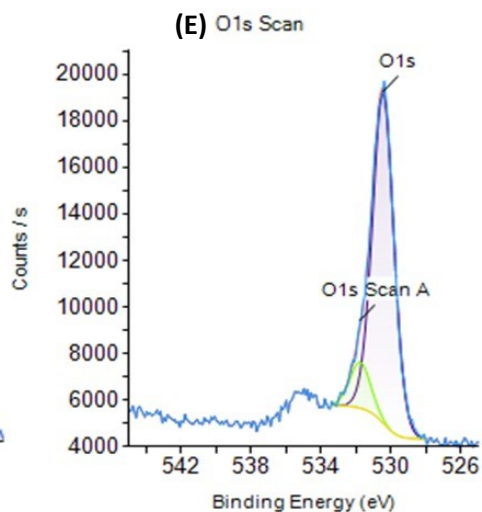

**Figure S2:** XPS spectrum of NSC-dots with atomic content (A). High resolution C 1s (B), N 1s (C), S2p (D), and O 1s (E) XPS spectra of NSC-dots.

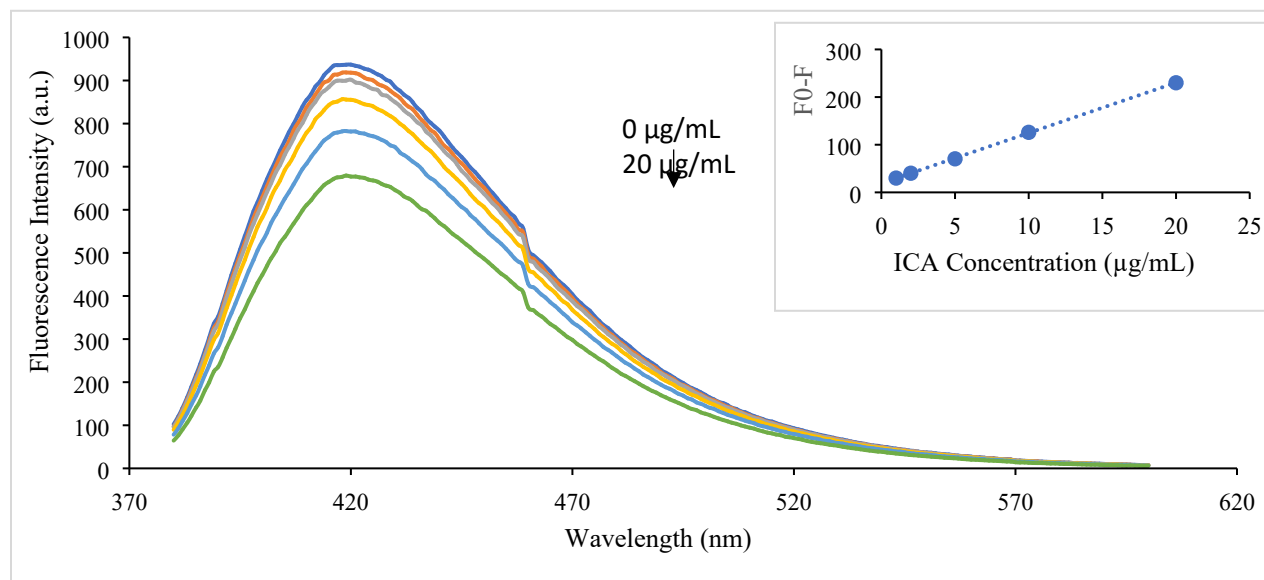

**Figure S3:** Fluorescence emission spectra of 0.1 mL NSC-dots in aqueous solution upon addition of various ICA concentrations (0.0-20  $\mu\text{g/mL}$ ) at  $\lambda_{\text{ex}} = 370 \text{ nm}$ . The inset represents the corresponding calibration curve.

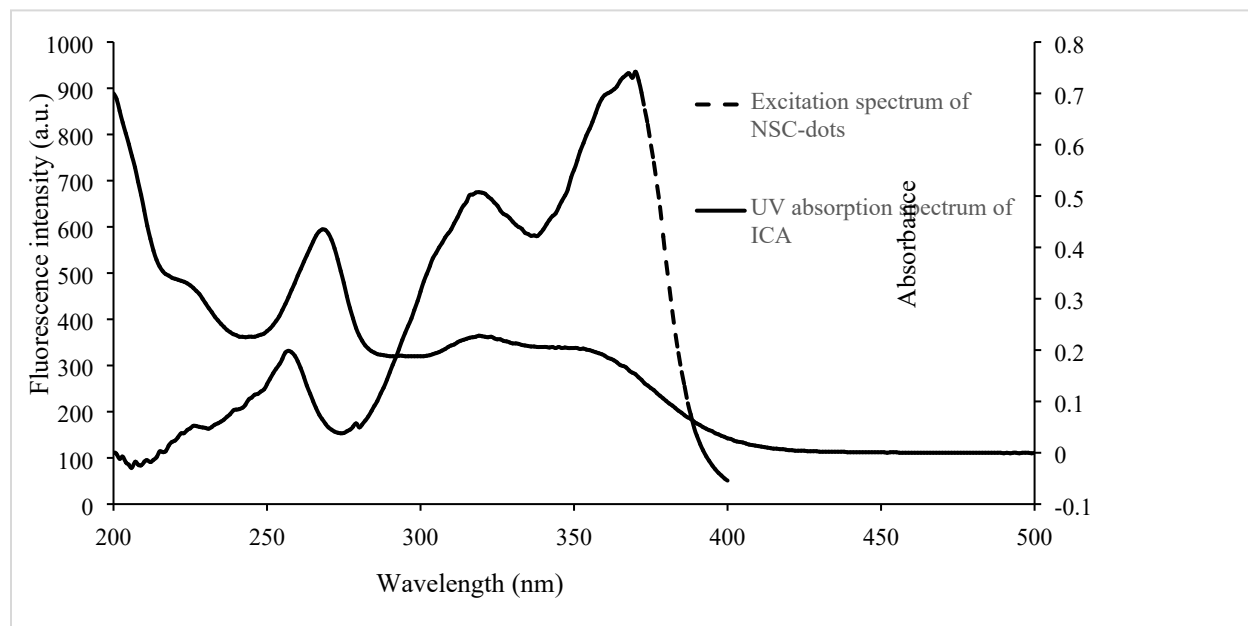

**Figure S4:** Plot showing overlap between UV-vis absorption spectrum of ICA (20  $\mu\text{g/mL}$ ) and fluorescence excitation scan of NSC-dots.

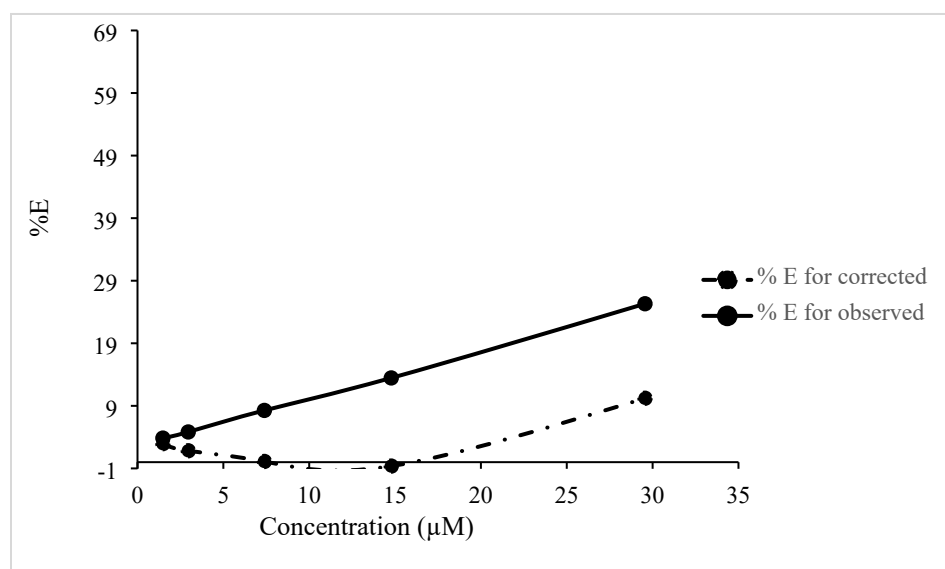

**Figure S5:** Suppressed efficiency (% E) of observed and corrected fluorescence of NSC-dots after addition of different molar concentrations of ICA.

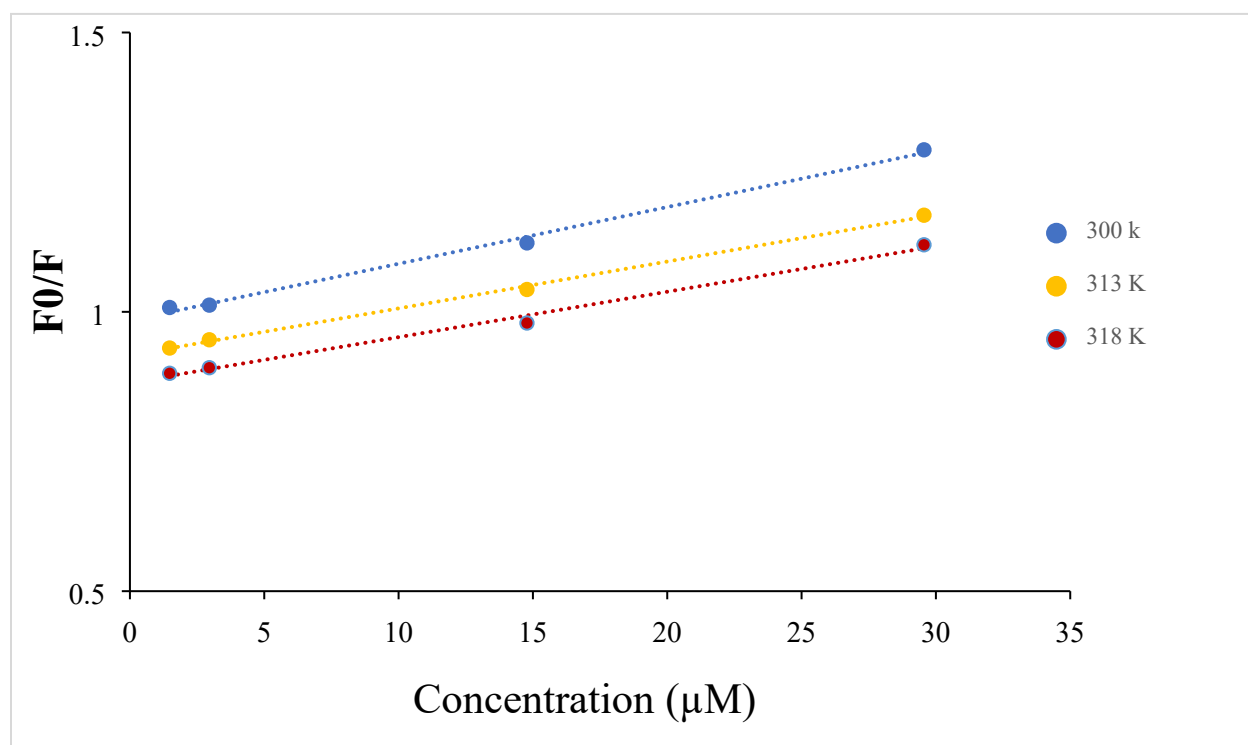

**Figure S6:** Stern– Volmer plot between  $F_0/F$  and concentration ( $\mu\text{M}$ ) of ICA at different temperatures.

(A)

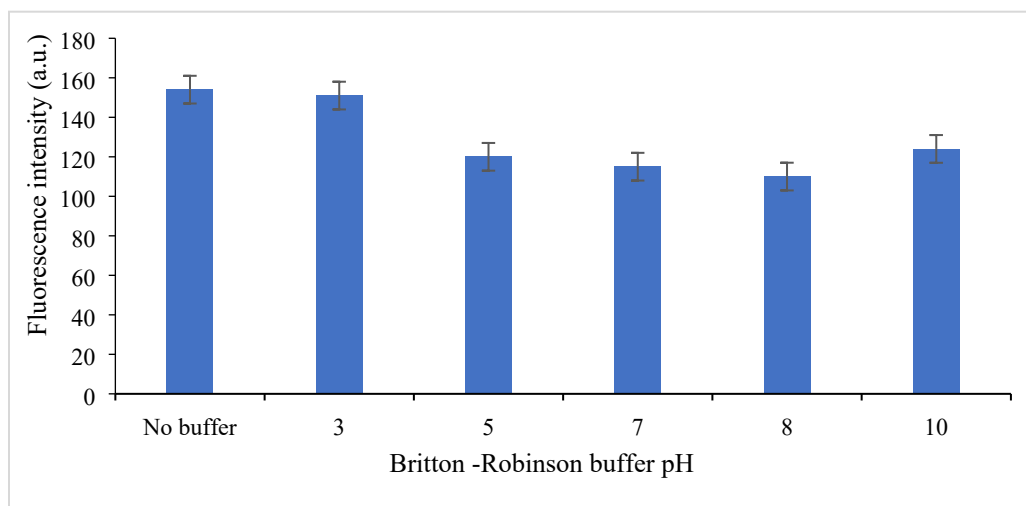

(B)

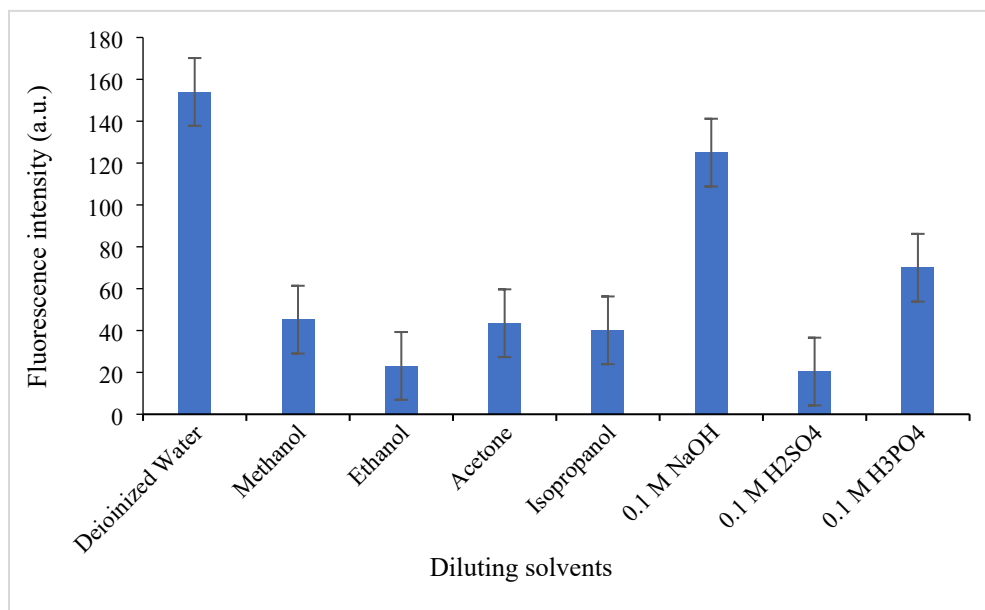

(C)

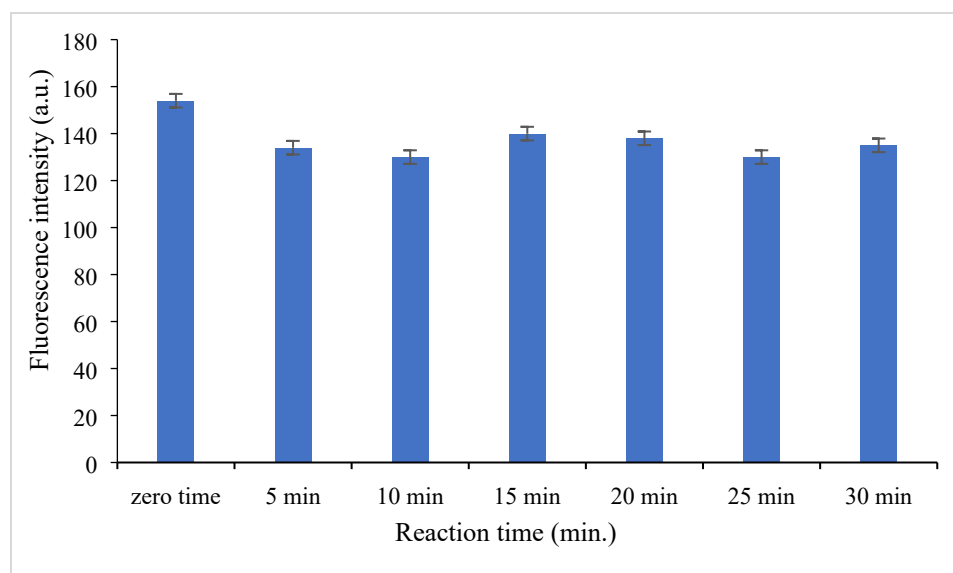

**Figure S7:** (A) Effect of Britton Robinson buffer pH (B) Effect of the diluting solvents. (C) Effect of incubation time on fluorescence quenching of NSC-dots by  $10 \mu\text{g mL}^{-1}$  ICA.

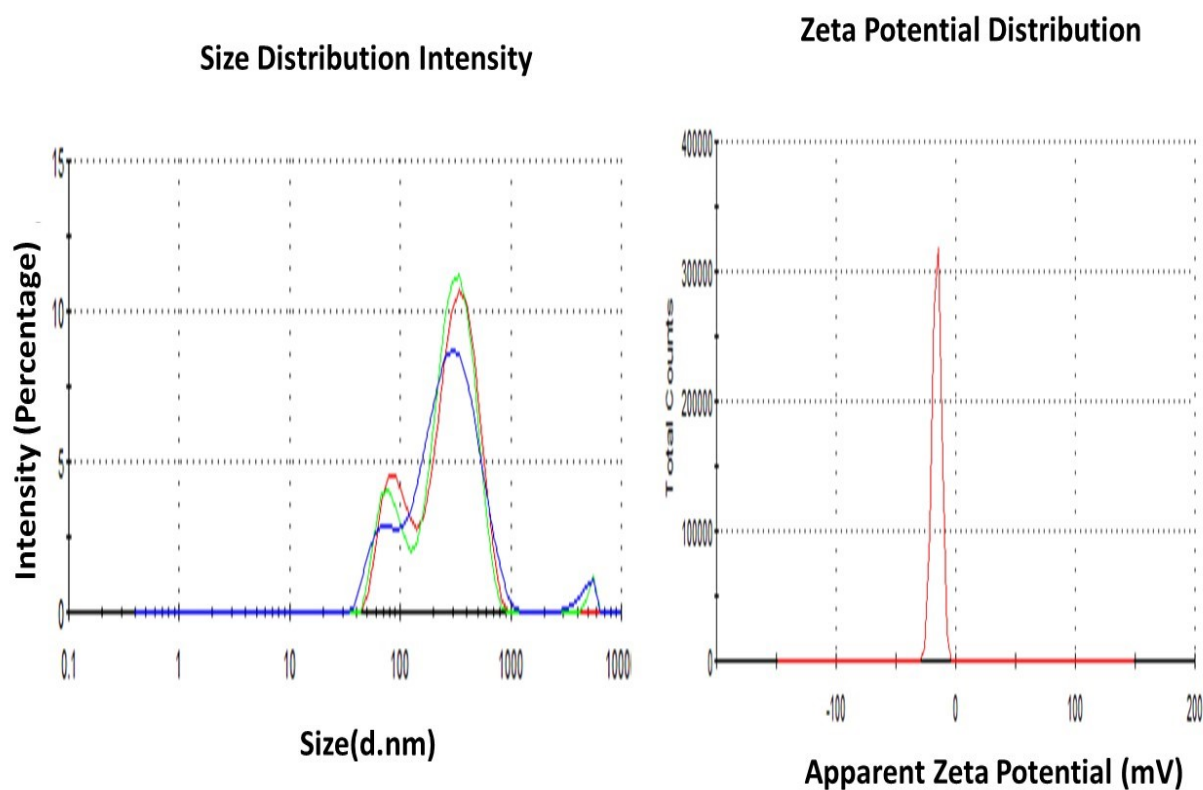

**Figure S8:** Particle size distribution, and zeta potential distribution of Icarin loaded whey protein nanoparticles.

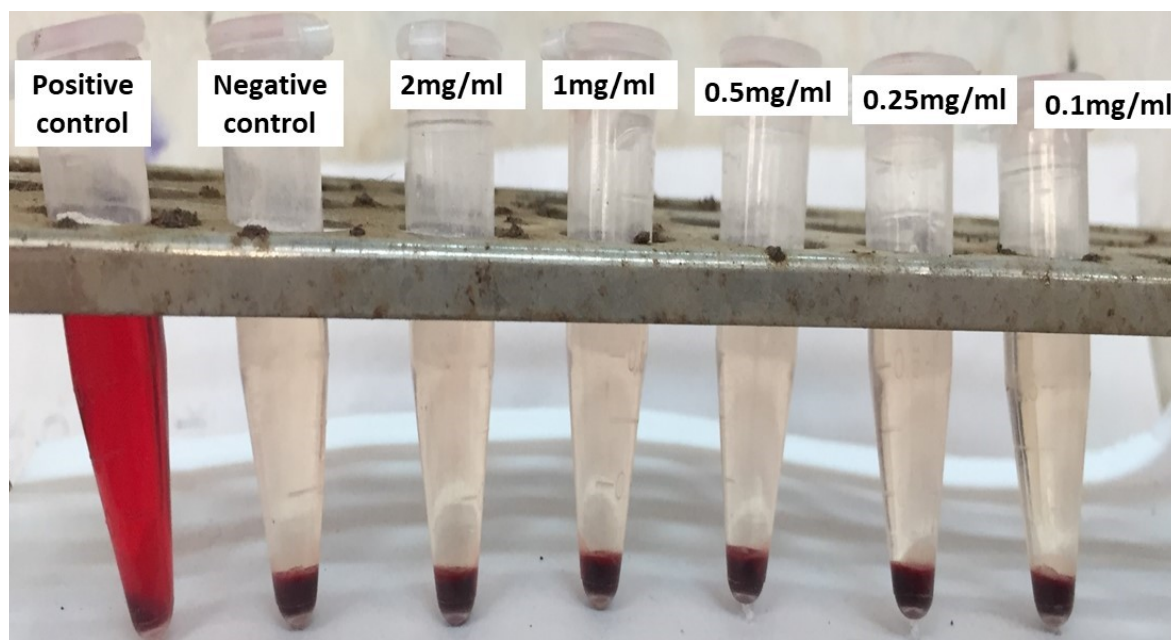

**Figure S9:** In vitro hemolysis image of ICA loaded whey protein nanoparticles

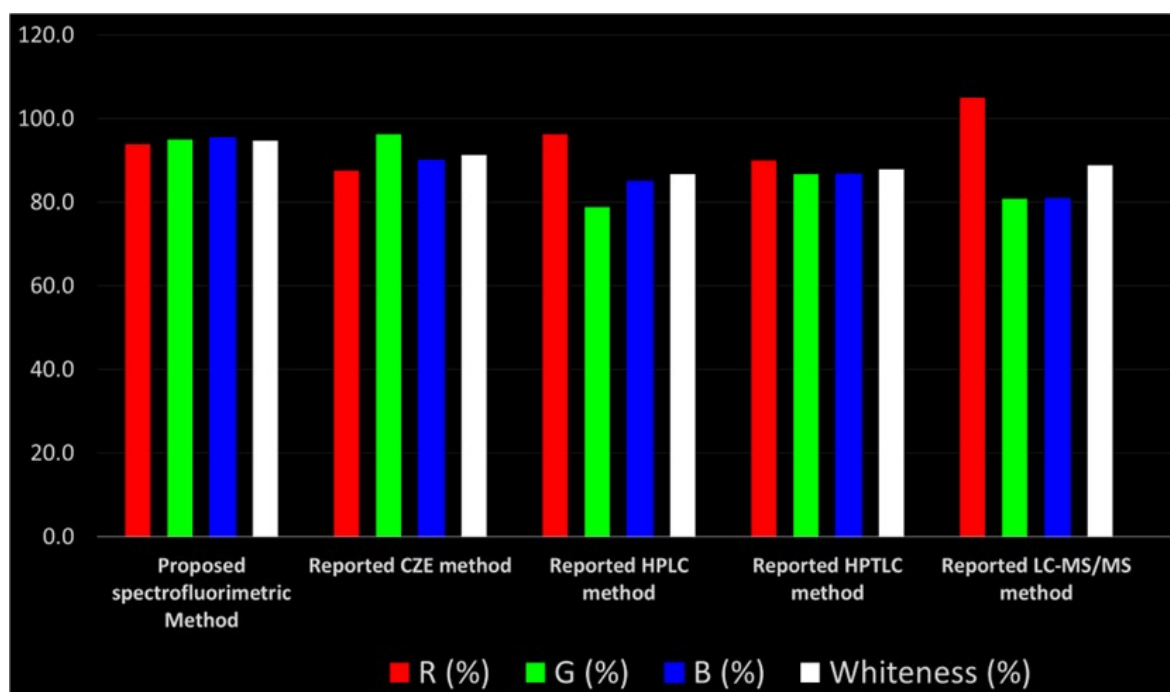

**Figure S10:** Comparison of the main evaluation outcomes obtained from RGB12 analysis of the proposed spectrofluorimetric method for determination of ICA with other reported methods. The white bar (whiteness %) indicates the arithmetic mean of the three other bars (red, green and blue).



| Proposed spectrofluorimetric Method                  |               |               |
|------------------------------------------------------|---------------|---------------|
| Individual criteria                                  |               |               |
| R1: Trueness                                         | R2: Precision | R3: LOD       |
| 53.2                                                 | 73.8          | 99.7          |
| G1: ChlorTox                                         |               | G2/B2: Energy |
| 100.0                                                |               |               |
| B1: Sample throughput                                |               |               |
| 72.2                                                 |               |               |
| Color saturation                                     |               |               |
| Red:                                                 | 73.2          | White:        |
| Green:                                               | 81.4          | 73            |
| Blue:                                                | 65.5          |               |
| Conclusion                                           |               |               |
| Proposed spectrofluorimetric Method seems most green |               |               |
| Proposed spectrofluorimetric Method seems most white |               |               |

**Figure S11:** Comparison of the proposed spectrofluorimetric method for determination of ICA with other reported methods in terms of the saturation of red, green, blue colors, and resulting whiteness as a holistic assessment using RGBfast.

**Table S1:** Analytical eco-scale for assessment of greenness of the proposed spectrofluorimetric method compared to other reported methods.

| The penalty points (PPs) to calculate Analytical Eco -scale |                                     |                                                      |                      |                       |                   |
|-------------------------------------------------------------|-------------------------------------|------------------------------------------------------|----------------------|-----------------------|-------------------|
| Reagent                                                     | Proposed spectrofluorimetric method | Reported capillary zone electrophoresis method (CZE) | Reported HPLC method | Reported HPTLC Method | Reported LC-MS/MS |
| Deionized water                                             | 0                                   |                                                      |                      |                       |                   |
| L-cysteine                                                  | 1                                   |                                                      |                      |                       |                   |
| Citric acid                                                 | 1                                   |                                                      |                      |                       |                   |
| Sodium Bicarbonate                                          | 1                                   |                                                      |                      |                       |                   |
| Borate                                                      |                                     | 4                                                    |                      |                       |                   |
| Glacial acetic acid                                         |                                     |                                                      |                      | 4                     |                   |
| Ethyl acetate                                               |                                     |                                                      |                      | 8                     |                   |
| Formic acid                                                 |                                     |                                                      |                      | 6                     | 6                 |
| Trifluoroacetic acid                                        |                                     |                                                      | 4                    |                       |                   |



|                                   |                       |    |    |    |    |
|-----------------------------------|-----------------------|----|----|----|----|
| Acetonitrile                      |                       | 4  | 4  |    | 4  |
| <b>Instrument</b>                 | <b>Penalty points</b> |    |    |    |    |
| Energy                            | 0                     | 0  | 1  | 1  | 2  |
| Waste                             | 3                     | 1  | 5  | 3  | 3  |
| Occupational hazards              | 0                     | 0  | 0  | 0  | 0  |
| <b>Final total penalty points</b> | 6                     | 9  | 14 | 22 | 15 |
| <b>Analytical eco-scale score</b> | 94                    | 91 | 86 | 78 | 85 |

**Table S2: RGB12 profiles of the proposed spectrofluorimetric method and other reported methods:**

| Method number | Method name                         | R (%) | G (%) | B (%) | Whiteness (%) |
|---------------|-------------------------------------|-------|-------|-------|---------------|
| 1             | Proposed spectrofluorimetric Method | 93.8  | 95.0  | 95.4  | 94.7          |
| 2             | Reported CZE method                 | 87.5  | 96.3  | 90.0  | 91.3          |
| 3             | Reported HPLC method                | 96.3  | 78.8  | 85.0  | 86.7          |
| 4             | Reported HPTLC method               | 90.0  | 86.7  | 86.7  | 87.8          |
| 5             | Reported LC-MS/MS method            | 105.0 | 80.8  | 80.8  | 88.9          |

**Table S3: NQS final scores of the proposed spectrofluorimetric method**

|                       |            |
|-----------------------|------------|
| <b>Need</b>           | <b>100</b> |
| <b>Quality</b>        | <b>95</b>  |
| <b>Sustainability</b> | <b>76</b>  |
| <b>NQS Index</b>      | <b>90</b>  |
